# Supplementary material for: Opportunistic offer of human papillomavirus (HPV) self-testing in ethnically diverse primary care clinics in Aotearoa New Zealand: an implementation study
Source: Research Square preprint supplement (doi:10.21203/rs.3.rs-6858056/v1), 2025-09-17
Supplement: Supplementary file 1 [file 2d7da46af9ac9aa9d9d4fa99.docx]

| **Demographic factor** | **Participants with a self-test kit** | **Self-test kits taken home** | | | | | **Samples (from home testing) returned** | | | |
| --- | --- | --- | --- | --- | --- | --- | --- | --- | --- | --- |
| **n** | **% of all self-test kits** | **OR (95% CI)** |  | **n** | | **% returned** | **OR (95% CI)** |  |
| **Ethnicity** |  |  |  |  |  |  | |  |  |  |
| Māori | 517 | 115 | 22% | 2.07 (1.39-3.10) | *** | 74 | | 64% | 0.76 (0.34-1.70) |  |
| Pacific | 1562 | 313 | 20% | 1.82 (1.26-2.62) | *** | 160 | | 51% | 0.44 (0.21-0.93) | * |
| Asian | 1387 | 170 | 12% | 1.01 (0.69-1.48) |  | 128 | | 75% | 1.29 (0.59-2.83) |  |
| European/Other | 305 | 37 | 12% | 1.00 |  | 26 | | 70% | 1.00 |  |
| **Age** |  |  |  |  |  |  | |  |  |  |
| 30-39 years | 1238 | 194 | 16% | 1.00 |  | 105 | | 54% | 1.00 |  |
| 40-49 years | 1050 | 169 | 16% | 1.03 (0.82-1.29) |  | 104 | | 62% | 1.36 (0.89-2.06) |  |
| 50-59 years | 929 | 172 | 19% | 1.22 (0.98-1.53) |  | 107 | | 62% | 1.40 (0.92-2.12) |  |
| 60-69 years | 554 | 100 | 18% | 1.19 (0.91-1.55) |  | 72 | | 72% | 2.18 (1.30-3.67) | *** |
| **Screening status (time overdue for screening)** | |  |  |  |  |  | |  |  |  |
| Never screened | 639 | 108 | 17% | 1.53 (1.10-2.13) | * | 55 | | 51% | 0.12 (0.05-0.29) | *** |
| Due (<6 months) | 564 | 66 | 12% | 1.00 |  | 59 | | 89% | 1.00 |  |
| Overdue (≥6 months to <2 years) | 1181 | 163 | 14% | 1.21 (0.89-1.64) |  | 129 | | 79% | 0.45 (0.19-1.07) |  |
| Under screened (≥2 years) | 1387 | 298 | 21% | 2.06 (1.55-2.75) | *** | 145 | | 49% | 0.11 (0.05-0.25) | *** |
| **Socioeconomic deprivation (NZ Dep 2018 quintile)** | | |  |  |  |  | |  |  |  |
| 5 (most deprived) | 1765 | 343 | 19% | 1.54 (1.26-1.88) | *** | 193 | | 56% | 0.57 (0.38-0.85) | ** |
| 4 | 719 | 115 | 16% | 1.21 (0.94-1.57) |  | 73 | | 63% | 0.77 (0.46-1.27) |  |
| 3 to 1 (least deprived) | 1202 | 163 | 14% | 1.00 |  | 113 | | 69% | 1.00 |  |
| Unknown | 85 | 14 | 16% | 1.26 (0.69-2.28) |  | 9 | | 64% | 0.80 (0.25-2.50) |  |
| **Total** | 3771 | 635 | 17% | - |  | 388 | | 61% | - |  |
