# Supplementary material for: Opportunistic offer of human papillomavirus (HPV) self-testing in ethnically diverse primary care clinics in Aotearoa New Zealand: an implementation study
Source: Research Square preprint supplement (doi:10.21203/rs.3.rs-6858056/v1), 2025-09-17
Supplement: Supplementary file 2 [file 4955bb26a01b629827f92a55.docx]

| **Demographic factor** | **Potentially eligible (n)** | **Participants** | | | | **Self-tested** | | | | |
| --- | --- | --- | --- | --- | --- | --- | --- | --- | --- | --- |
| **n** | **% of potentially eligible** | **OR (95% CI)** |  | **n** | **% of potentially eligible** | **OR (95% CI)** |  | **% of participants** |
| **Ethnicity** |  |  |  |  |  |  |  |  |  |  |
| Māori | 1373 | 517 | 38% | 0.80 (0.70-1.00) |  | 476 | 35% | 0.78 (0.65-0.94) | ** | 92% |
| Pacific | 3883 | 1562 | 40% | 0.90 (0.79-1.09) |  | 1409 | 36% | 0.84 (0.71-0.99) | * | 90% |
| Asian | 3309 | 1387 | 42% | 1.00 (0.85-1.17) |  | 1345 | 41% | 1.01 (0.86-1.19) |  | 97% |
| European/Other | 727 | 305 | 42% | 1.00 |  | 294 | 40% | 1.00 |  | 96% |
| **Age** |  |  |  |  |  |  |  |  |  |  |
| 30-39 years | 3376 | 1238 | 37% | 1.00 |  | 1149 | 34% | 1.00 |  | 93% |
| 40-49 years | 2441 | 1050 | 43% | 1.30 (1.17-1.45) | *** | 985 | 40% | 1.31 (1.18-1.46) | *** | 94% |
| 50-59 years | 2012 | 929 | 46% | 1.50 (1.32-1.66) | *** | 864 | 43% | 1.46 (1.30-1.63) | *** | 93% |
| 60-69 years | 1463 | 554 | 38% | 1.10 (0.93-1.19) |  | 526 | 36% | 1.09 (0.96-1.24) |  | 95% |
| **Screening status (time overdue for screening)** | | |  |  |  |  |  |  |  |  |
| Never screened | 2107 | 639 | 30% | 0.39 (0.33-0.45) | *** | 586 | 28% | 0.35 (0.30-0.41) | *** | 92% |
| Due (<6 months) | 1065 | 564 | 53% | 1.00 |  | 557 | 52% | 1.00 |  | 99% |
| Overdue (≥6 months to <2 years) | 2293 | 1181 | 52% | 0.94 (0.82-1.09) |  | 1147 | 50% | 0.91 (0.79-1.06) |  | 97% |
| Under screened (≥2 years) | 3827 | 1387 | 36% | 0.50 (0.44-0.58) | *** | 1234 | 32% | 0.43 (0.38-0.50) | *** | 89% |
| **Socioeconomic deprivation (NZ Dep 2018 quintile)** | | |  |  |  |  |  |  |  |  |
| 5 (most deprived) | 4547 | 1765 | 39% | 0.80 (0.75-0.91) | *** | 1615 | 36% | 0.78 (0.70-0.86) | *** | 92% |
| 4 | 1757 | 719 | 41% | 0.90 (0.80-1.02) |  | 677 | 39% | 0.88 (0.78-1.00) | * | 94% |
| 3 to 1 (least deprived) | 2776 | 1202 | 43% | 1.00 |  | 1152 | 41% | 1.00 |  | 96% |
| Unknown | 212 | 85 | 40% | 0.90 (0.66-1.17) |  | 80 | 38% | 0.85 (0.64-1.14) |  | 94% |
| **Total** | 9292 | 3771 | 41% | - |  | 3524 | 38% | - |  | 93% |
