# Supplementary material for: Opportunistic offer of human papillomavirus (HPV) self-testing in ethnically diverse primary care clinics in Aotearoa New Zealand: an implementation study
Source: Research Square preprint supplement (doi:10.21203/rs.3.rs-6858056/v1), 2025-09-17
Supplement: Supplementary file 3 [file a8c5c75782ab8d974722e5c8.docx]

**Supplementary file 3:** Comparison of the eligible and participant cohorts by demographic factors.

| **Demographic factor** | **Potentially eligible** | | **95% CI** | | **Participants** | | **95% CI** |
| --- | --- | --- | --- | --- | --- | --- | --- |
| **n** | **% of total** |  | **n** | | **% of total** |  |
| **Ethnicity** | | | | | | | |
| Māori | 1373 | 14.8% | 14.1%-15.5% | 517 | | 13.7% | 12.6%-14.8% |
| Pacific | 3883 | 41.8% | 40.8%-42.8% | 1562 | | 41.4% | 40.0%-43.0% |
| Asian | 3309 | 35.6% | 34.6%-36.6% | 1387 | | 36.8% | 35.3%-38.3% |
| European/Other | 727 | 7.8% | 7.3%-8.4% | 305 | | 8.1% | 7.3%-9.0% |
| **Age** | | | | | | | |
| 30-39 years | 3376 | 36.3% | 14.1%-15.5% | 1238 | | 32.8% | 31.3%-34.3% |
| 40-49 years | 2441 | 26.3% | 40.8%-42.8% | 1050 | | 27.8% | 26.4%-29.3% |
| 50-59 years | 2012 | 21.7% | 34.6%-36.6% | 929 | | 24.6% | 23.3%-26.0% |
| 60-69 years | 1463 | 15.7% | 7.3%-8.4% | 554 | | 14.7% | 13.6%-15.9% |
| **Screening status (time overdue for screening)** | | | | | | | |
| Never screened | 2107 | 22.7% | 14.1%-15.5% | 639 | | 16.9% | 15.8%-18.2% |
| Due (<6 months) | 1065 | 11.5% | 40.8%-42.8% | 564 | | 15.0% | 13.9%-16.1% |
| Overdue (≥6 months to <2 years) | 2293 | 24.7% | 34.6%-36.6% | 1181 | | 31.3% | 29.9%-32.8% |
| Under screened (≥2 years) | 3827 | 41.2% | 7.3%-8.4% | 1387 | | 36.8% | 35.3%-38.3% |
| **Socioeconomic deprivation (NZ Dep 2018 quintile)** | | | | | | | |
| 5 (most deprived) | 4547 | 48.9% | 14.1%-15.5% | 1765 | | 46.8% | 45.2%-48.4% |
| 4 | 1757 | 18.9% | 40.8%-42.8% | 719 | | 19.1% | 17.8%-20.4% |
| 3 to 1 (least deprived) | 2776 | 29.9% | 34.6%-36.6% | 1202 | | 31.9% | 30.4%-33.4% |
| Unknown | 212 | 2.3% | 7.3%-8.4% | 85 | | 2.3% | 1.8%-2.8% |
| **Total** | 9292 | 100% | **-** | 3771 | | 100% | **-** |
