# Supplementary material for: Opportunistic offer of human papillomavirus (HPV) self-testing in ethnically diverse primary care clinics in Aotearoa New Zealand: an implementation study
Source: Research Square preprint supplement (doi:10.21203/rs.3.rs-6858056/v1), 2025-09-17
Supplement: Supplementary file 4 [file b51ed999469855352aafb4eb.docx]

**Supplementary file 2.** Participant text message wording.

| **Text message description** | **Wording** | **Send day** |
| --- | --- | --- |
| Kit taken home (participants who took a kit home) | Kia ora, welcome to the Cervical screening self-test study. Once you have taken your sample, you can drop it off at any Labtests/Awanui centre. Need help? Give us a call on 0800 747 354 to speak to our support team. Thank you. | Day 0 |
| Kit follow-up (participants who took a kit home and do not have an HPV test result at day 21) | Kia ora, we wanted to follow-up to see if you needed any help with your cervical screening self-test sample. If you need a new kit or have any questions our friendly support team and study nurses are available to help. Call us on 0800 747 354. Thanks! Te Whatu Ora Health NZ | After 21 calendar days from taking a kit home |
| Kit follow-up (participants who took a kit home, do not have an HPV test result, and do not answer the call attempt on day 35 or 49) | Kia ora, I just called to see how you are getting on with the cervical screening test kit sent a few weeks ago.  If you need a new kit or have any questions, reply to this text or call us on 0800 747 354. Thanks! Te Whatu Ora Health NZ | After 35 and 49 calendar days |
| Final kit reminder (participants who took a kit home and do not have an HPV test result on day 77) | Kia ora, you have a cervical screening test still to complete. Screening saves lives, for any help to do your test or to get a new kit, reply to this text. Thanks, Te Whatu Ora Health NZ. | After 77  calendar days |
| Negative HPV results (participants who have an ‘HPV not detected’ test result) | Kia ora, your recent cervical screening self-test result came back negative, meaning no HPV was found on your sample. Your next cervical screening will be due in 5 years time. Your result has been sent to your GP. If you want to know more about HPV you can visit [www.timetoscreen.nz/cervical-screening/](http://www.timetoscreen.nz/cervical-screening/)    Thank you for participating in the Cervical Screening Self-test Study. This study will inform how the National Cervical Screening Programme will be run ─ we would love to know how your experience was. Please complete our quick survey <https://bit.ly/3o58atm> | Once study nurse confirms result |
| Survey for positive results (participants who have an ‘HPV detected’ test result) | Kia ora, our study nurse recently talked to you about your cervical screening result. If you want to know more information about HPV you can visit www.waitematadhb.govt.nz/healthy-living/hpv-study/  Thank you for participating in the Cervical Screening Self-test Study. This study will inform how the National Cervical Screening Programme will be run ─ your feedback is important. We would appreciate hearing how your experience was. Please complete the study survey https://bit.ly/3wIRyfv | After study nurse discusses result and next steps with participant |
