# Supplementary material for: Opportunistic offer of human papillomavirus (HPV) self-testing in ethnically diverse primary care clinics in Aotearoa New Zealand: an implementation study
Source: Research Square preprint supplement (doi:10.21203/rs.3.rs-6858056/v1), 2025-09-17
Supplement: Supplementary file 5 [file c9cd52ad5b78e1a41a17a26e.docx]

**Supplementary file 4.** Interview schedule.

**Section 1: Involvement in the study**

| ***Your role*** | GP | Nurse | | Other (specify) |
| --- | --- | --- | --- | --- |
| ***Are you a smear-taker?*** | Yes | | No | |
| ***Accredited by the study to consent women?*** | Yes | | No | |
| ***Clinic*** | _______________ | | | |

**Section 2: Offering the self-test**

We’d like to find out a bit about your experience of offering the cervical screening self-test to women when they presented to the clinic for another reason.

*In general, how receptive were women to being offered a self-test for cervical screening when they were at the clinic for another reason?*

*Did you find there were particular barriers or challenges to offering the test to women who were due? What were they?*

*In your experience did many women decline the self-test?*

*What seemed to the most common reasons for women declining the self-test?*

*What were the main reasons for women opting to take the kt home?*

*Were there any things that particularly enabled/supported the offer or uptake of the self-test in the clinic?*

**Section 3: Information for women**

In your view, after the explanation and study brochure, how good was most women’s understanding

- *of HPV testing?*
- *of the self-test (as opposed to a smear for example)?*

*Do you have any thoughts about the main information needs for women around HPV self-testing, or how well they were met by the information in the study brochure and instructions?*

**Section 4: Results follow-up for women**

In the study, women with positive HPV results had results communicated and followed up by the study nurses.

*Do you have any thoughts about the advantages or disadvantages of having results followed up by a specialised cervical screening centre?*

*What was your experience of liaising with the study nurses about eligibility or follow up for women?*

**Section 5: Other comments**

*Is there any other information or feedback you’d like to provide about the offer, training and follow up used in the study?*

**Section 6: Demographics**

**What is your gender?**

|  | Male |
| --- | --- |
|  | Female |
|  | Gender diverse |
|  | Prefer not to answer |

**What ethnic groups do you belong to?** Tick the box or boxes that apply to you.

|  | New Zealand European |
| --- | --- |
|  | Māori |
|  | Samoan |
|  | Cook Island Maori |
|  | Tongan |
|  | Niuean |
|  | Chinese |
|  | Indian |
|  | Other e.g. Dutch, Japanese, Tokelauan;  Please state_____________________ |

**What age group are you? (optional)**

|  | 20-29 |
| --- | --- |
|  | 30- 39 |
|  | 40-49 |
|  | 50-59 |
|  | 60+ |
